# Supplementary material
Source: PubMed Central journal article supplement (PMC7484034)
Supplement: NIHMS1613163-supplement-1.pdf [file NIHMS1613163-supplement-1.pdf]

**Supplemental Figure 1**

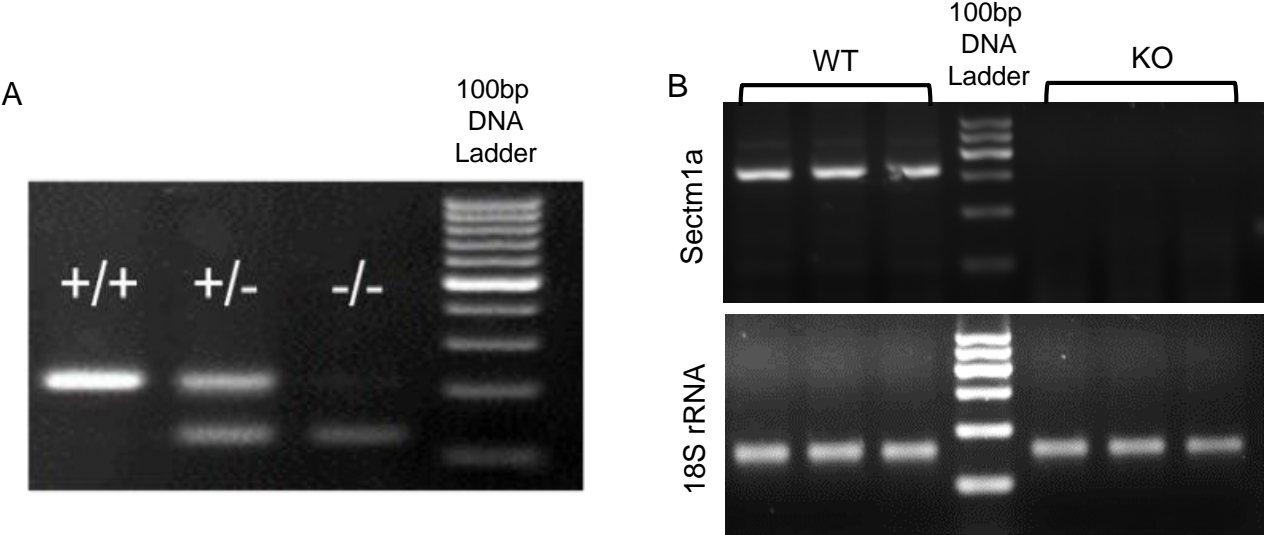

**Supplemental Figure 1. Validation of the Sectm1a-knockout mouse model.**

(A) Representative agarose gel image assessing genotypes in mice. (B) Products of qRT-PCR were run on agarose gel, and validated that Sectm1a-KO model was successfully generated.

## Supplemental Figure 2

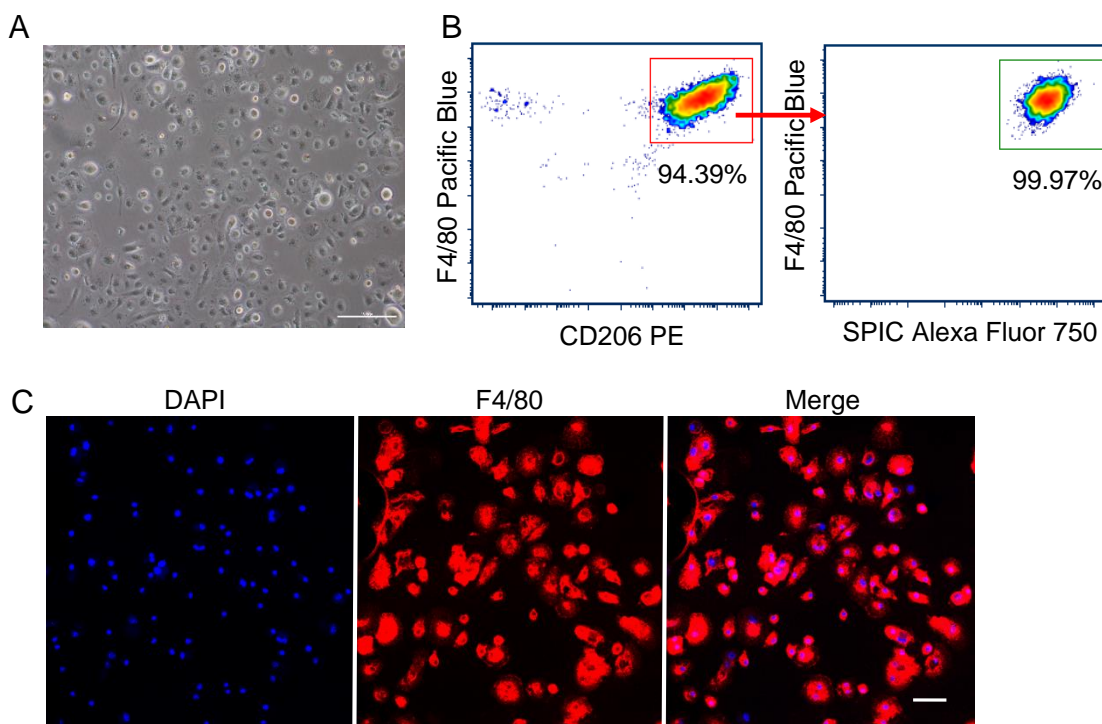

**Supplemental Figure 2. Validation of RPMs isolated from the mouse spleen.** (A) The bright field image showed the morphology of RPMs on day 7 after isolation. Scale bar: 100  $\mu\text{m}$ . (B) Using flow cytometry analysis, isolated RPMs were confirmed by the expression of F4/80, CD206 and SPIC. (C) RPMs were stained with F4/80 antibody (Red). The nucleus was stained with DAPI (Blue). Scale bar: 20  $\mu\text{m}$ .
